# Supplementary material
Source: PubMed Central journal article supplement (PMC5705269)
Supplement: NIHMS907723-supplement-supplement_1.pdf [file NIHMS907723-supplement-supplement_1.pdf]

**eTable 1.** Most Radiographic Descriptors by Radiologists Were Not Significantly Associated with Pathologic Microvascular Invasion and Had Weak Interobserver Agreement

|                                                                 | All tumors (n = 120)               |                                   |        | Tumors ≤ 5 cm (n=51)              |                                   |        | Tumors > 5 cm (n = 69)            |                                   |        |
|-----------------------------------------------------------------|------------------------------------|-----------------------------------|--------|-----------------------------------|-----------------------------------|--------|-----------------------------------|-----------------------------------|--------|
|                                                                 | Radiologist 1 vs path MVI, p value | Radiologist 2 vs path MVI p value | Kappa  | Radiologist 1 vs path MVI p value | Radiologist 2 vs path MVI p value | Kappa  | Radiologist 1 vs path MVI p value | Radiologist 2 vs path MVI p value | Kappa  |
| Internal artery                                                 | <b>0.007</b>                       | 0.370                             | 0.075  | 0.894                             | 0.235                             | 0.031  | <b>0.010</b>                      | 0.307                             | 0.040  |
| No hypodense halo                                               | 0.229                              | 0.821                             | 0.651  | 0.258                             | 0.807                             | 0.788  | 0.305                             | 0.710                             | 0.602  |
| No tumor liver difference                                       | <b>0.017</b>                       | 0.363                             | 0.452  | 0.090                             | 0.412                             | 0.377  | 0.199                             | 0.840                             | 0.479  |
| Internal artery + no hypodense halo + no tumor liver difference | 0.476                              | 0.628                             | -0.001 | 0.704                             | 0.702                             | -0.074 | 0.618                             | 1.000                             | 0.096  |
| Nonsmooth margin                                                | 0.466                              | 0.159                             | 0.487  | 0.157                             | 0.611                             | 0.302  | 0.553                             | 0.368                             | 0.561  |
| Peripheral rim enhancement                                      | 0.137                              | 0.131                             | 0.160  | 0.243                             | 0.591                             | 0.255  | 0.330                             | 0.204                             | 0.115  |
| Peritumoral enhancement                                         | 0.337                              | 0.927                             | 0.630  | 0.212                             | 0.891                             | 0.662  | 0.835                             | 0.258                             | -0.092 |

MVI, microvascular invasion; path, pathologic.
